1 **Title:** Risk Factors of Multi-Drug Resistant Tuberculosis among Tuberculosis Patients in  
2 Province 3, Nepal: A case-control study

3 **Short title:** MDR-TB Risk Factors in Nepal

4 **Authors:** Puspa Acharya<sup>1\*</sup>, Niraj Bhattarai<sup>2</sup>, Bhuban Raj Kunwar<sup>3</sup>, Khem Raj Sharma<sup>4</sup>, Vijay  
5 Kumar Khanal<sup>4</sup>, Birendra Kumar Yadav<sup>4</sup>

6 **Affiliations:** <sup>1</sup>Department of Public Health, Shree Birendra Hospital, Chhauni, Kathmandu,  
7 Nepal; <sup>2</sup>Nepal Development Society, Kathmandu, Nepal; <sup>3</sup> Department of Anesthesia, Shree  
8 Birendra Hospital, Chhauni, Kathmandu, Nepal; <sup>4</sup> B.P Koirala Institute of Health Sciences,  
9 Dharan, Sunsari Nepal

10 **Email address of authors:** [puspacharyas@gmail.com](mailto:puspacharyas@gmail.com) [P. Acharya], [bniraj80@gmail.com](mailto:bniraj80@gmail.com)  
11 [N.Bhattarai], [drbrkunwar@yahoo.com](mailto:drbrkunwar@yahoo.com) [B.R. Kunwar], [Khemraja@gmail.com](mailto:Khemraja@gmail.com) [KR.Sharma],  
12 [vijay.khanal@bпкиh.edu](mailto:vijay.khanal@bпкиh.edu) [VK. Khanal], [bkyadav1@gmail.com](mailto:bkyadav1@gmail.com) [BK. Yadav]

13

14 **\*Corresponding author:** [puspacharyas@gmail.com](mailto:puspacharyas@gmail.com) [P. Acharya]

15

## 16 **Abstract**

17

18 **Background:** Drug-resistant tuberculosis poses a significant threat to global TB control  
19 efforts, potentially reversing progress made in reducing TB-related morbidity and mortality.  
20 This study aims to identify risk factors for multidrug-resistant TB [MDR-TB] in Province 3,  
21 Nepal.

22

23 **Methodology:** A case-control study was conducted by matching TB-infected patients  
24 undergoing MDR-TB treatment and DS-TB treatment by gender. Data was collected through  
25 structured questionnaires and interviews and analyzed using binary logistic regression.

26

27 **Results:** Significant risk factors for MDR-TB included Pulmonary Tuberculosis [PTB],  
28 previous TB treatment history, close contact with DR-TB patients, and subjective feelings of  
29 sadness.

30

31 **Conclusion:** The study highlights the importance of prevention measures to break transmission  
32 chains and infection control in health facilities. Additionally, it underscores the need for mental  
33 health support for TB patients.

**NOTE:** This preprint reports new research that has not been certified by peer review and should not be used to guide clinical practice.

34 **Keywords:** MDR-TB, Risk Factors, Previous Treatment History

35

## 36 **Introduction**

37

38 Tuberculosis [TB] is the most common cause of death worldwide and the leading cause of  
39 death from a single infectious agent, even exceeding HIV/AIDS. An estimated 10.0 million  
40 [range, 9.0– 11.1 million] people fell ill with TB in 2018; there were 1.2 million TB deaths  
41 among HIV-negative people in 2018 and a further 2,51,000 deaths among HIV-positive  
42 people(1).In April 1993, the World Health Organization [WHO] declared tuberculosis a public  
43 health emergency[2]. After defining the nature and size of the global TB problem, WHO  
44 introduced the Directly Observed Treatment Short-course [DOTS] as a solution to an  
45 emergency[3]. The expanding HIV epidemic and the growth of drug-resistant tuberculosis  
46 [DR-TB] further subverted the DOTS strategy, which was hampered by imprecise diagnostic  
47 tools and passive case detection(4).

48 Antimicrobial Resistance [AMR] is an increasingly significant threat to public health, and the  
49 rise of AMR coincides with the development of TB (5,6). The rise of drug-resistant tuberculosis  
50 has the potential to reverse progress made to scale back tuberculosis-related morbidity and  
51 mortality over the past 20 years. Drug resistance emerges as a result of inadequate tuberculosis  
52 treatment, which could be an incorrect combination of tuberculosis drugs, inadequate dose or  
53 duration, or irregular drug-taking. These problems can occur in any setting but are particularly  
54 prevalent in poorly regulated non-public sectors(7). Multi-drug resistant tuberculosis [MDR-  
55 TB] is tuberculosis that is resistant to at least two first-line drugs, isoniazid and  
56 rifampicin(8).TB strains with DR-TB are harder to treat than drug-susceptible ones and also  
57 take much longer(9). Globally, only half of the MDR-TB patients are treated successfully; the  
58 other half are at high risk of either not surviving or continuing to transmit the disease and  
59 threaten global progress towards the targets set by the End TB Strategy of the World Health  
60 Organization [WHO](4). Globally, in 2018, an estimated 3.4% [95% confidence interval [CI]:  
61 2.5–4.4%] of new cases and 18% [95% CI: 7.6–31%] of previously treated cases had MDR/RR-  
62 TB. There were 484,000 [range, 417,000–556,000] incident cases of MDR/RR-TB in 2018,  
63 and only 32% of the estimated patients were enrolled in treatment. The highest proportions are  
64 in several countries of the former Soviet Union [above 25% in new cases and above 50% in  
65 previously treated cases. World Health Organization [WHO] has recently updated the guidance  
66 on DR-TB treatment by including Levofloxacin [a fluoroquinolone] and pyrazinamide as a

67 component of the treatment regimens for MDR/RR-TB and isoniazid-resistant, rifampicin-  
68 susceptible TB [Hr-TB](1). As MDR-TB involves more extensive and longer treatment courses  
69 than drug-susceptible TB, households with multidrug resistances are at a particularly greater  
70 risk of incurring catastrophic costs(10). The percentage facing catastrophic total costs ranged  
71 from 27% to 83% for all forms of TB and from 67% to 100% for drug-resistant TB (1). The  
72 disease can affect anyone anywhere, but most people who develop TB [about 90%] are adults,  
73 and the male: female ratio is 2:1[1]; long-term exposure to ambient SO<sub>2</sub> is likely to increase  
74 the risk of TB in males(11). Global targets and milestones for reducing the burden of TB  
75 disease have been set as part of the Sustainable Development Goals [SDGs] and the World  
76 Health Organization's End TB Strategy, and seven countries with high TB burdens were also  
77 on track to achieve 2020 END TB milestones during this period (1).

78  
79 Tuberculosis [TB] remains a serious public health problem in the South-East Asia Region  
80 [SEAR] as well (12). DR-TB burden was higher in India [27%], China [14%] and the Russian  
81 Federation [9%] in 2018(1).TB is also the leading cause of disability-adjusted life years  
82 [DALYs] lost among people in the region among all communicable diseases, affecting the  
83 productive age group of the countries in SEAR(13). Similarly, Myanmar has over 70% of TSR  
84 for MDR-TB and was on track to achieve 2020 END TB milestones.(1).

85  
86 It has been predicted that deaths attributable to AMR could rise more than tenfold to 10 million  
87 annually by 2050. Unless action is taken now, DR-TB could be responsible for about 2.5  
88 million of these deaths(14). A global total of 186 772 cases of multidrug-resistant TB or  
89 rifampicin-resistant TB [MDR/RR-TB] were notified in 2018, up from 160 684 in 2017, and  
90 156 071 cases were enrolled in treatment, up from 139 114 in 2017. Despite these  
91 improvements, only 32% of the estimated 484,000 cases [range 417,000–556,000] were  
92 enrolled in treatment in 2018(1). The uncontrolled TB burden impacts socio-economic  
93 development and increases drug resistance in the SEAR region (15). If tuberculosis  
94 management practices across sectors in India remain unchanged over the next 20 years, it is  
95 estimated a 47% increase in the incidence of isoniazid resistance, a 152% increase in MDR-  
96 TB incidence, a 242% increase in prevalent untreated multidrug-resistant tuberculosis, and a  
97 275% increase in the risk of multidrug-resistant tuberculosis infection(7).

98  
99 In Nepal, there are approximately 1500 [0.84 to 2.4] cases of DR-TB annually, and only 350

100 to 450 MDR-TB cases are reported annually. So, the missing cases are the major problem in  
101 Nepal(8). There are major challenges for diagnosis of MDR TB in Nepal, such as inadequate  
102 training, frequent power failure, difficulty in maintaining an appropriate steady temperature,  
103 module failure, which is often not replaced in time, issues with calibration and timely  
104 availability of cartridges, as well as appropriate ways to store the new cartridges and safe  
105 disposal of the used cartridges (16). From a public health perspective, the MDR-TB growing  
106 epidemics will not be controlled merely by the introduction of a few new antibiotics as it is  
107 also linked to patient compliance and adequate case management supported by efficient TB  
108 programs(17). Deaths from drug-resistant TB now account for about one-third of all  
109 antimicrobial resistance deaths worldwide. Treating DR-TB is costlier and may take three to  
110 fourfold as long as not all people will survive.(6). The latest treatment outcome data for people  
111 with MDR/RR-TB showed a global treatment success rate of only 56%(1).

112 As MDR-TB involves more extensive and longer treatment courses than drug-susceptible TB,  
113 households with multidrug resistance are at a particularly greater risk of incurring catastrophic  
114 costs. The study identified the factors associated with resistance that might assist concerned  
115 authorities in focusing efforts on those factors in the community. This might help prevent and  
116 control tuberculosis and MDR-TB by influencing Public Health Policy. As MDR-TB involves  
117 more extensive and longer treatment courses than drug-susceptible TB, households with  
118 multidrug resistance are at a particularly greater risk of incurring catastrophic costs. Hence,  
119 ending TB will benefit the poorest ones.(10). This study aims to assess the risk factors of Multi-  
120 Drug-Resistant Tuberculosis among Tuberculosis patients of Province 3, Nepal.

121

## 122 **METHODS**

123

124 The study used a case-control design to evaluate the risk of MDR-TB, which was conducted in  
125 Province 3, Nepal, which is known for its high MDR-TB burden. Cases comprised confirmed  
126 MDR-TB patients undergoing treatment at selected MDR treatment centres and sub-centres in  
127 Kathmandu, Bhaktapur, and Chitwan. At the same time, controls consisted of TB patients  
128 receiving anti-tuberculosis drugs at designated DOTS centres in the same districts. Inclusion  
129 criteria for cases required confirmation of MDR-TB through records from the MDR-TB  
130 treatment center, while controls encompassed pulmonary and extra-pulmonary TB patients on  
131 anti-tuberculosis medication. Exclusions were applied to severely ill patients who were unable  
132 to participate and those under 15 years old. The study adhered to ethical considerations,

133 received clearance from the institutional review committee, and obtained informed verbal  
134 consent from respondents, ensuring confidentiality and data integrity. The researcher also took  
135 permission from the National Tuberculosis Control Centre, Thimi Bhaktapur, to conduct this  
136 research in the selected study sites after receiving IRC clearance. The structured questionnaire  
137 was prepared after a substantial literature review, and a piloting study was done among TB  
138 patients of BPKIHs, Dharan, by obtaining verbal consent from the participants. The study was  
139 conducted from March 2021 to August 2021. The operational definition used in the study is  
140 included as a supplementary document.

141

### 142 **Sampling Technique:**

143

144 The three districts were selected randomly, and all the DR-TB centres from these districts were  
145 included in the study. The subjects who gave consent were interviewed. Cases were selected  
146 from these DR-TB treatment centres/subcentre such as Nepal Anti-TB Association-  
147 Kathmandu, Japan Nepal Tuberculosis Research association-Kathmandu, National  
148 Tuberculosis Control centre-Bhaktapur, Nepal Anti-TB Association- Chitwan. All the DS-TB  
149 cases with approved verbal consent were interviewed. DOTS centres such as Manmohan  
150 Memorial Medical College and Teaching Hospital- Kathmandu, Nagarik Community Hospital-  
151 Bhaktapur, Bharatpur Health office, Parbatipur Health Post, Genetup-Kathmandu, JANTRA-  
152 Kathmandu, NATA-Chitwan were selected for this study.

153

### 154 **Calculation of the sample size:**

155 The study period was fixed for six months, and during the study periods, all the laboratory-  
156 confirmed and registered DR-TB patients were asked to participate from all treatment  
157 centres/sub-centres in selected districts—Chitwan, Kathmandu, and Bhaktapur. Despite  
158 approximately 85 DR-TB patients across these districts, only 77 agreed to participate. All the  
159 DS-TB cases were also interviewed, and gender matching was ensured using SPSS, resulting  
160 in a final sample size of 154 respondents, maintaining a 1:1 ratio of cases to controls.

161

### 162 **Data Collection Techniques**

163

164 Amidst the challenges posed by the COVID-19 pandemic, a second wave in Nepal, a face-to-  
165 face interview was undertaken to collect data from both cases and controls. The clinical

166 attributes of the participants were meticulously validated against their laboratory records.  
167 Despite the pandemic's constraints, conducting interviews proved to be difficult. However, the  
168 institution provided a designated counselling room, coupled with the use of appropriate  
169 personal protective equipment [PPE] and adherence to social distancing measures; data  
170 collection was successfully facilitated. Recent episodes of TB history were taken to avoid recall  
171 bias, and a researcher collected data herself to minimise interviewer variations.

172

### 173 **Data Management and Analysis**

174 Data entry was conducted using Microsoft Excel and subsequently transferred to SPSS version  
175 16 for statistical analysis. Before entry, numerical coding was manually prepared based on the  
176 nature of the data, and regular cross-checking ensured accuracy, with verification after every  
177 ten entries. Descriptive statistics, Frequency, and percentages were employed to present case  
178 and control frequencies. The inferential analysis utilised chi-square tests for categorical  
179 nominal data association and binary regression analysis for variables potentially predictive of  
180 MDR-TB, with significance set at  $p < 0.05$  and 95% confidence intervals. Factors exhibiting a  
181 p-value less than 0.020 in bivariate analysis underwent binary logistic regression for further  
182 analysis after adjusting confounders.

### 183 **Variables of the**

#### 184 **study:**

#### 185 **Independent variable**

- 186 ✓ Age
- 187
- 188 ✓ Gender
- 189
- 190 ✓ Weight
- 191
- 192 ✓ Marital status
- 193
- 194 ✓ Residence
- 195
- 196 ✓ Education
- 197
- 198 ✓ Occupation
- 199
- 200 ✓ Monthly income
- 201

- 202 ✓ Ethnicity
- 203
- 204 ✓ Religion
- 205
- 206 ✓ Family type
- 207
- 208 ✓ Co- Morbid (HIV/AIDS & Other diseases)
- 209
- 210 ✓ stigma
- 211
- 212 ✓ social isolation
- 213
- 214 ✓ Means of transportation
- 215
- 216 ✓ Subjective feelings of sadness
- 217

## 218 **Associated factors**

219

- 220 ✓ Types of TB
- 221
- 222 ✓ Previous History of TB
- 223
- 224 ✓ Interruption of TB treatment
- 225
- 226 ✓ Contact with TB patients
- 227
- 228 ✓ Contact with DR TB patients
- 229
- 230 ✓ Response to Treatment Phase
- 231
- 232 ✓ Counselling session
- 233

## 234 **Dependent variable**

235

- 236 ✓ Multi Drug Resistant Tuberculosis (MDR-TB)

237

## 238 **RESULTS**

239

240 Table 1 illustrates demographic and socio-economic characteristics between cases and controls.  
241 While both groups have similar gender distributions, with males representing 55.8% and  
242 females 44.2%, the control group has a higher proportion of individuals under 35 years [64.9%]  
243 compared to the case group [58.4%]. Marital status and ethnicity are largely comparable, but



244 there are differences in residence, education, and employment status. The control group has  
 245 more residents in metropolitan cities [62.3% vs. 41.6% in cases] and fewer in rural areas  
 246 [13.0% vs. 37.7% in cases]. Additionally, a higher percentage of cases are unemployed [44.2%  
 247 vs. 33.8% in controls] and more are students [24.7% vs. 31.2% in controls]. Access to health  
 248 facilities within 30 minutes is higher in the control group [96.1% vs. 66.2% in cases], and they  
 249 utilize private health facilities more [85.7% vs. 58.8% in cases].

250 **Table 1: Demographic and Socio-economic characteristics of respondents.**

| Characteristics                                       | Case [n=77]<br>Frequency [n] | Percentage<br>[%] | Control<br>Frequency [n] | [n=77]<br>Percentage<br>[%] |
|-------------------------------------------------------|------------------------------|-------------------|--------------------------|-----------------------------|
| <b>Age</b>                                            |                              |                   |                          |                             |
| < 35                                                  | 45                           | [58.4%]           | 50                       | [64.9%]                     |
| ≥ 35                                                  | 32                           | [41.6%]           | 27                       | [35.1%]                     |
| <b>Gender</b>                                         |                              |                   |                          |                             |
| Male                                                  | 43                           | [55.8%]           | 43                       | [55.8%]                     |
| Female                                                | 34                           | [44.2%]           | 34                       | [44.2%]                     |
| <b>Marital status</b>                                 |                              |                   |                          |                             |
| Unmarried                                             | 32                           | [41.60%]          | 35                       | [45.50%]                    |
| Married                                               | 43                           | [55.80%]          | 41                       | [53.20%]                    |
| Widow                                                 | 1                            | [1.30%]           | 1                        | [1.30%]                     |
| Widower                                               | 1                            | [1.30%]           | 0                        | [0.00%]                     |
| <b>Residence</b>                                      |                              |                   |                          |                             |
| Metropolitan city                                     | 32                           | [41.6%]           | 48                       | [62.3%]                     |
| Municipality                                          | 16                           | [20.8%]           | 19                       | [24.7%]                     |
| Rural Municipality                                    | 29                           | [37.7%]           | 10                       | [13.0%]                     |
| <b>Education</b>                                      |                              |                   |                          |                             |
| Uneducated                                            | 5                            | [6.5%]            | 5                        | [6.5%]                      |
| Primary level                                         | 22                           | [28.6%]           | 13                       | [16.9%]                     |
| Secondary level                                       | 20                           | [26.0%]           | 28                       | [36.4%]                     |
| Higher level education                                | 30                           | [39.0%]           | 31                       | [40.3%]                     |
| <b>Occupation</b>                                     |                              |                   |                          |                             |
| Unemployed                                            | 34                           | [44.2%]           | 26                       | [33.8%]                     |
| Formal sector employee                                | 10                           | [13.0%]           | 15                       | [19.5%]                     |
| Informal sector employee                              | 14                           | [18.2%]           | 12                       | [15.6%]                     |
| Student                                               | 19                           | [24.7%]           | 24                       | [31.2%]                     |
| <b>Monthly Income of employed respondents [n= 51]</b> |                              |                   |                          |                             |
| < Rs 24000                                            | 12                           | [50%]             | 15                       | [55.6%]                     |
| ≥ Rs 24000                                            | 12                           | [50%]             | 12                       | [44.4%]                     |
| <b>Ethnicity</b>                                      |                              |                   |                          |                             |
| Dalit                                                 | 2                            | [2.6%]            | 4                        | [5.2%]                      |
| Janajati                                              | 41                           | [53.2%]           | 41                       | [53.2%]                     |
| Madhesi                                               | 2                            | [2.6%]            | 1                        | [1.3%]                      |
| Muslim                                                | 3                            | [3.9%]            | 1                        | [1.3%]                      |
| Brahmin/Chhetri                                       | 29                           | [37.7%]           | 29                       | [37.7%]                     |



|                                            |     |          |    |          |
|--------------------------------------------|-----|----------|----|----------|
| Others                                     | 0   | [0.0%]   | 1  | [1.3%]   |
| <b>Religion</b>                            |     |          |    |          |
| Hindu                                      | 57  | [74.0%]  | 65 | [84.4%]  |
| Buddhist                                   | 17  | [22.1%]  | 8  | [10.4%]  |
| Muslim                                     | 3   | [3.9%]   | 1  | [1.3%]   |
| Christian                                  | 0   | [0.0%]   | 3  | [3.9%]   |
| <b>Family Type</b>                         |     |          |    |          |
| Nuclear                                    | 39  | [50.60%] | 46 | [59.70%] |
| Joint                                      | 36  | [46.80%] | 30 | [39.00%] |
| Extended                                   | 2   | [2.60%]  | 1  | [1.30%]  |
| <b>Presence of Adequate Ventilation</b>    |     |          |    |          |
| No                                         | 20  | [25.9%]  | 8  | [10.3%]  |
| Yes                                        | 57  | [74.1%]  | 69 | [89.7%]  |
| <b>Recent Migration</b>                    |     |          |    |          |
| No                                         | 35  | [45.5%]  | 50 | [64.9%]  |
| Yes                                        | 42  | [54.5%]  | 27 | [35.1%]  |
| <b>Types of Migration</b>                  |     |          |    |          |
| Internal Migration                         | 37  | [88.1%]  | 23 | [85.2%]  |
| External Migration                         | 5   | [11.9%]  | 4  | [14.8%]  |
| <b>Time to reach Health Facilities</b>     |     |          |    |          |
| Less than 30 minutes                       | 51  | [66.2%]  | 74 | [96.1%]  |
| Greater than 30 minutes                    | 26  | [33.8%]  | 3  | [3.9%]   |
| <b>Means of Transportation</b>             |     |          |    |          |
| Cycle                                      | 1   | [1.3%]   | 2  | [2.6%]   |
| Bike/Scooter                               | 11  | [14.3%]  | 25 | [32.5%]  |
| Public Vehicle                             | 64  | [83.1%]  | 41 | [53.2%]  |
| By foot                                    | 1   | [1.3%]   | 9  | [11.7%]  |
| <b>Health-seeking Behavior of patients</b> |     |          |    |          |
| Too late                                   | 57  | [74.0%]  | 51 | [66.2%]  |
| In time                                    | 171 | [22.1%]  | 25 | [32.5%]  |
| Early                                      | 3   | [3.9%]   | 1  | [1.3%]   |
| <b>Treatment Initiation site</b>           |     |          |    |          |
| Public Health Facilities                   | 43  | [58.8%]  | 11 | [14.3%]  |
| Private Health Facilities                  | 34  | [42.2%]  | 66 | [85.7%]  |

251

252 Table 2 shows that pulmonary TB cases were higher among the cases, at 89.6%, compared to  
 253 57.1% in the control group. Conversely, Extra Pulmonary TB cases were more prevalent in the  
 254 Controls at 42.9% versus 10.4% in the Cases. Notably, a prior history of TB was significantly  
 255 more common among Cases, with 63.6% compared to a mere 10.4% in Controls. Among those  
 256 with a TB history, Cases experienced treatment interruptions at a higher rate of 51.0%,  
 257 contrasting with just 12.5% in Controls. Reasons for such interruptions varied, with  
 258 complications accounting for 8% among Cases and none among Controls, while loss to follow-  
 259 up stood at 16% for Cases versus 100% for Controls. Additionally, 25% of Cases switched to

260 MDR treatment compared to none in Controls. Close contact with TB patients was markedly  
 261 more prevalent among Cases [64.9%] than Controls [32.5%], with similar trends observed for  
 262 contact with DR TB patients. Notably, negative sputum conversion rates were higher among  
 263 Cases [79.2%] versus Controls [66.2%]. Hospital stays were significantly more common  
 264 among Cases [89.6%] than Controls [31.2%]. Treatment modalities also exhibited disparities,  
 265 with 44.2% of Cases receiving treatment after failure compared to none in Controls and 48.1%  
 266 of Cases undergoing the intensive treatment phase versus 74.0% of Controls. In terms of TB  
 267 treatment categories, Cases predominantly fell into LR1 [58.5%] and LR2 [31.1%] categories,  
 268 while Controls were exclusively categorized as CAT I [100%].

269 **Table 2: Clinical Characteristics of Respondents**

| Characteristics                                                                     | Case[n=77]<br>Frequency | Percentage [%] | Control[n=77]<br>Frequency | Percentage [%] |
|-------------------------------------------------------------------------------------|-------------------------|----------------|----------------------------|----------------|
| <b>Tuberculosis Types</b>                                                           |                         |                |                            |                |
| Pulmonary TB                                                                        | 69                      | [89.6%]        | 44                         | [57.1%]        |
| Extra Pulmonary TB                                                                  | 8                       | [10.4%]        | 33                         | [42.9%]        |
| <b>Previous history of TB</b>                                                       |                         |                |                            |                |
| No                                                                                  | 28                      | [36.4%]        | 69                         | [89.6%]        |
| Yes                                                                                 | 49                      | [63.6%]        | 8                          | [10.4%]        |
| <b>If yes, was there any interruption of TB treatment [n= 49 cases, 8 controls]</b> |                         |                |                            |                |
| No                                                                                  | 24                      | [49.0%]        | 7                          | [87.5%]        |
| Yes                                                                                 | 25                      | [51.0%]        | 1                          | [12.5%]        |
| <b>Reason for interruption of TB treatment [n= 25 cases, 1 controls]</b>            |                         |                |                            |                |
| Complication                                                                        | 2                       | [8%]           | 0                          | [0%]           |
| Loss to follow up                                                                   | 4                       | [16%]          | 1                          | [100%]         |
| Switch to MDR                                                                       | 5                       | [25%]          | 0                          | [0%]           |
| Site Changed                                                                        | 1                       | [4%]           | 0                          | [0%]           |
| TAF                                                                                 | 12                      | [48%]          | 0                          | [0%]           |
| Workload                                                                            | 1                       | [4%]           | 0                          | [0%]           |
| <b>Close contact with TB Patients</b>                                               |                         |                |                            |                |
| No                                                                                  | 27                      | [35.1%]        | 52                         | [67.5%]        |
| Yes                                                                                 | 50                      | [64.9%]        | 25                         | [32.5%]        |
| <b>Close contact with DR TB patients</b>                                            |                         |                |                            |                |
| No                                                                                  | 38                      | [49.4%]        | 76                         | [98.7%]        |
| Yes                                                                                 | 39                      | [50.6%]        | 1                          | [1.3%]         |
| <b>Response to TB treatment [Sputum Conversion]</b>                                 |                         |                |                            |                |
| Negative                                                                            | 61                      | [79.2%]        | 51                         | [66.2%]        |
| Positive                                                                            | 16                      | [20.8%]        | 26                         | [33.8%]        |
| <b>Experience of hospital stays</b>                                                 |                         |                |                            |                |
| No                                                                                  | 8                       | [10.4%]        | 53                         | [68.8%]        |
| Yes                                                                                 | 69                      | [89.6%]        | 24                         | [31.2%]        |
| <b>Registration category of patients</b>                                            |                         |                |                            |                |
| New                                                                                 | 23                      | [29.9%]        | 69                         | [89.6%]        |
| Relapse                                                                             | 26                      | [20.8%]        | 8                          | [10.4%]        |
| Treatment After                                                                     |                         |                |                            |                |

|                                    |    |         |    |         |
|------------------------------------|----|---------|----|---------|
| Failure                            | 34 | [44.2%] | 0  | [0.0%]  |
| Treatment after loss to follow-up  | 2  | [2.6%]  | 0  | [0.0%]  |
| Others previously Treated          | 1  | [1.3%]  | 0  | [0.0%]  |
| Previous Treatment History Unknown | 1  | [1.3%]  | 0  | [0.0%]  |
| <b>Treatment Phase</b>             |    |         |    |         |
| Intensive                          | 37 | [48.1%] | 57 | [74.0%] |
| Continuous                         | 40 | [51.9%] | 20 | [26.0%] |
| <b>TB Treatment Category</b>       |    |         |    |         |
| LR1                                | 45 | [58.5%] | 0  | [0%]    |
| LR2                                | 24 | [31.1%] | 0  | [0%]    |
| LR3                                | 1  | [1.3%]  | 0  | [0%]    |
| SSTR                               | 4  | [5.2%]  | 0  | [0%]    |
| Others                             | 3  | [3.9%]  | 0  | [0%]    |
| CAT I                              | 0  | [0%]    | 77 | [100%]  |

270

271 Table 3 presents psychological and social tuberculosis-related variables [TB] among cases and  
 272 controls. In the cases group, 54.5% attended TB counselling sessions, which was notably  
 273 higher than 85.7% in the control group. Regarding HIV status, 93.5% of Cases were negative,  
 274 compared to 100% of Controls. Additionally, 31.2% of Cases reported having other diseases,  
 275 contrasting with 24.7% in the control group. Alcohol consumption was notably prevalent  
 276 among Cases at 76.6%, whereas 68.8% of Controls reported the same. Smoking was more  
 277 common among Cases [51.9%] than in Controls [18.2%], and similarly, illicit drug use was  
 278 higher in Cases [18.2%] than in Controls [2.6%]. The incidence of imprisonment was minimal  
 279 in both groups, with Cases slightly higher at 3.9% compared to Controls at 2.6%. Social  
 280 isolation was more pronounced among Cases at 53.2% compared to Controls at 39.0%. Cases  
 281 also reported higher rates of perceived stigma associated with TB, with 74.0% fearing loss of  
 282 friends and employment, 77.9% experiencing social stigma, and 55.8% preferring privacy  
 283 regarding their TB status, whereas Controls reported lower rates in these categories.  
 284 Furthermore, Cases exhibited higher nervousness levels [76.6%] and sadness [58.4%] than  
 285 Controls. Troubles within the past 12 months were reported by 46.8% of Cases and 14.3% of  
 286 Controls. Despite challenges, both groups expressed happiness, with 79.2% of Cases and  
 287 88.3% of Controls considering themselves happy despite their TB status.

288 **Table 3: Psychological and co-morbidity status of respondents**

| Variables                                   | Case [n=77]<br>Frequency [n] | Percentage<br>[%] | Control [n=77]<br>Frequency [n] | Percentage<br>[%] |
|---------------------------------------------|------------------------------|-------------------|---------------------------------|-------------------|
| <b>Attended any TB counselling sessions</b> |                              |                   |                                 |                   |
| No                                          | 35                           | [45.50%]          | 11                              | [14.30%]          |

|                                                                         |    |          |    |          |
|-------------------------------------------------------------------------|----|----------|----|----------|
| Yes                                                                     | 42 | [54.50%] | 66 | [85.70%] |
| <b>HIV status</b>                                                       |    |          |    |          |
| Negative                                                                | 72 | [93.5%]  | 77 | [100.0%] |
| Positive                                                                | 5  | [6.5%]   | 0  | [00.0%]  |
| <b>Presence of other disease</b>                                        |    |          |    |          |
| No                                                                      | 53 | [68.8%]  | 58 | [75.3%]  |
| Yes                                                                     | 24 | [31.2%]  | 19 | [24.7%]  |
| <b>Alcohol consumption</b>                                              |    |          |    |          |
| No                                                                      | 18 | [23.4%]  | 24 | [31.2%]  |
| Yes                                                                     | 59 | [76.6%]  | 53 | [68.8%]  |
| <b>Smoking</b>                                                          |    |          |    |          |
| No                                                                      | 37 | [48.1%]  | 63 | [81.8%]  |
| Yes                                                                     | 40 | [51.9%]  | 14 | [18.2%]  |
| <b>Illicit drug use</b>                                                 |    |          |    |          |
| No                                                                      | 63 | [81.8%]  | 75 | [97.4%]  |
| Yes                                                                     | 14 | [18.2%]  | 2  | [2.6%]   |
| <b>Imprisonment</b>                                                     |    |          |    |          |
| No                                                                      | 74 | [96.10%] | 75 | [97.40%] |
| yes                                                                     | 3  | [3.90%]  | 2  | [2.60%]  |
| <b>Social isolation</b>                                                 |    |          |    |          |
| No                                                                      | 36 | [46.8%]  | 30 | [39.0%]  |
| Yes                                                                     | 41 | [53.2%]  | 47 | [61.0%]  |
| <b>I feel that I will lose friends and employment because I have TB</b> |    |          |    |          |
| No                                                                      | 20 | [26.0%]  | 55 | [71.4%]  |
| Yes                                                                     | 57 | [74.0%]  | 22 | [28.6%]  |
| <b>People look at me differently because I have tuberculosis</b>        |    |          |    |          |
| No                                                                      | 17 | [22.1%]  | 49 | [63.6%]  |
| Yes                                                                     | 60 | [77.9%]  | 28 | [36.4%]  |
| <b>I don't like other people to know that I have TB</b>                 |    |          |    |          |
| No                                                                      | 34 | [44.2%]  | 24 | [31.2%]  |
| Yes                                                                     | 43 | [55.8%]  | 53 | [68.8%]  |
| <b>I consider myself nervous</b>                                        |    |          |    |          |
| No                                                                      | 18 | [23.4%]  | 41 | [53.2%]  |
| Yes                                                                     | 59 | [76.6%]  | 36 | [46.8%]  |
| <b>Sometimes I feel so sad that nothing can cheer me up</b>             |    |          |    |          |
| No                                                                      | 32 | [41.6%]  | 68 | [88.3%]  |
| Yes                                                                     | 45 | [58.4%]  | 9  | [11.7%]  |
| <b>Did something trouble you during the past 12 months?</b>             |    |          |    |          |
| No                                                                      | 41 | [53.2%]  | 66 | [85.7%]  |
| Yes                                                                     | 36 | [46.8%]  | 11 | [14.3%]  |
| <b>Despite of disease, I think I am happy.</b>                          |    |          |    |          |
| No                                                                      | 16 | [20.80%] | 16 | [11.70%] |
| Yes                                                                     | 61 | [79.20%] | 61 | [88.30%] |

290 Table 4 shows several significant associations highlighting key environmental and socio-  
 291 economic factors. Cases group exhibit a notably higher prevalence in rural areas, with 37.7%  
 292 residing in rural municipalities compared to only 13.0% of controls [ $p = 0.02$ ]. Recent

293 migration emerges as a significant factor, with 54.5% of Cases reporting recent migration  
 294 compared to 35.1% of controls [p = 0.015]. Additionally, inadequate ventilation is more  
 295 prevalent among the cases group, with 26.0% reporting inadequate ventilation compared to  
 296 10.4% of controls [p = 0.012]. Access to healthcare services is also impacted, as evidenced by  
 297 66.2% of cases taking more than 30 minutes to reach health facilities compared to only 3.9%  
 298 of controls [p < 0.001]. These findings underscore the critical influence of environmental and  
 299 socio-economic determinants on TB prevalence and access to healthcare, emphasizing the  
 300 importance of targeted interventions to address these disparities for effective TB prevention  
 301 and control strategies.

302 **Table 4 : Key Factors associated with MDR-TB**

| Characteristics          | Case[n=77]<br>Frequency [%] | Control[n=77]<br>Frequency [%] | P<br>value |
|--------------------------|-----------------------------|--------------------------------|------------|
| <b>Age</b>               |                             |                                |            |
| <35                      | 45 [58.4%]                  | 50 [64.9%]                     | 0.407      |
| ≥ 35                     | 32 [41.6%]                  | 27 [35.5%]                     |            |
| <b>Gender</b>            |                             |                                |            |
| Male                     | 43 [55.8%]                  | 43 [55.8%]                     | 1.000      |
| Female                   | 34 [44.2%]                  | 34 [44.2%]                     |            |
| <b>Marital status</b>    |                             |                                |            |
| Unmarried                | 32 [41.60%]                 | 35 [45.50%]                    | 0.468      |
| Married                  | 43 [55.80%]                 | 41 [53.20%]                    |            |
| Widow                    | 1 [1.30%]                   | 1 [1.30%]                      |            |
| Widower                  | 1 [1.30%]                   | 0 [0.00%]                      |            |
| <b>Residence</b>         |                             |                                |            |
| Metropolitan city        | 32 [41.6%]                  | 48 [62.3%]                     | 0.02       |
| Municipality             | 16 [20.8%]                  | 19 [24.7%]                     |            |
| Rural Municipality       | 29 [37.7%]                  | 10 [13.0%]                     |            |
| <b>Education</b>         |                             |                                |            |
| Uneducated               | 5 [6.5%]                    | 5 [6.5%]                       | 0.30       |
| Primary level            | 22 [28.6%]                  | 13 [16.9%]                     |            |
| Secondary level          | 20 [26.0%]                  | 28 [36.4%]                     |            |
| Higher level education   | 30 [39.0%]                  | 31 [40.3%]                     |            |
| <b>Occupation</b>        |                             |                                |            |
| Unemployed               | 34 [44.2%]                  | 26 [33.8%]                     | 0.591      |
| Formal sector employee   | 10 [13.0%]                  | 15 [19.5%]                     |            |
| Informal sector employee | 14 [18.2%]                  | 12 [15.6%]                     |            |
| student                  | 19 [24.7%]                  | 24 [31.2%]                     |            |
| <b>Ethnicity</b>         |                             |                                |            |
| Brahmin/Chhetri          | 29 [37.7%]                  | 29 [37.7%]                     | 1.000      |
| Others                   | 48[62.3%]                   | 48[62.3%]                      |            |
| <b>Religion</b>          |                             |                                |            |
| Hindu                    | 57 [74.0%]                  | 65 [84.4%]                     | 0.112      |
| Non-Hindu                | 20 [26.0%]                  | 12 [15.6%]                     |            |
| <b>Family Type</b>       |                             |                                |            |

|                                            |             |             |                  |
|--------------------------------------------|-------------|-------------|------------------|
| Nuclear                                    | 39 [50.60%] | 46 [59.70%] | 0.231            |
| Joint                                      | 36 [46.80%] | 30 [39.00%] |                  |
| Extended                                   | 2 [2.60%]   | 1 [1.30%]   |                  |
| <b>Adequate ventilation</b>                |             |             |                  |
| No                                         | 20 [26.0%]  | 8 [10.4%]   | 0.012            |
| Yes                                        | 57 [74.0%]  | 69 [89%]    |                  |
| <b>Recent Migration</b>                    |             |             |                  |
| No                                         | 35 [45.5%]  | 50 [64.9%]  | <b>0.015</b>     |
| Yes                                        | 42 [54.5%]  | 27 [35.1%]  |                  |
| <b>Types of Migration</b>                  |             |             |                  |
| Internal Migration                         | 37 [88.1%]  | 23 [85.2%]  | 0.729            |
| External Migration                         | 5 [11.9%]   | 4 [14.8%]   |                  |
| <b>Time to reach Health Facilities</b>     |             |             |                  |
| Less than 30 minutes                       | 51 [66.2%]  | 74 [96.1%]  | <b>&lt;0.001</b> |
| Greater than 30 minutes                    | 26 [33.8%]  | 3 [3.9%]    |                  |
| <b>Means of Transportation</b>             |             |             |                  |
| Cycle                                      | 1 [1.3%]    | 2 [2.6%]    | 0.060            |
| Bike/Scooter                               | 11 [14.3%]  | 25 [32.5%]  |                  |
| Public Vehicle                             | 64 [83.1%]  | 41 [53.2%]  |                  |
| By foot                                    | 1 [1.3%]    | 9 [11.7%]   |                  |
| <b>Health-seeking Behavior of patients</b> |             |             |                  |
| Too late                                   | 57 [74.0%]  | 51 [66.2%]  | 0.53             |
| In time                                    | 17 [22.1%]  | 25 [32.5%]  |                  |
| Early                                      | 3 [3.9%]    | 1 [1.3%]    |                  |

303

304 Table 5 depicted Pulmonary TB as notably more prevalent among cases [89.6%] compared to  
305 controls [57.1%], indicating it as a significant risk factor [ $p < 0.001$ ; OR: 6.5; 95% CI: 2.7-  
306 15.2]. Conversely, controls exhibited a higher incidence of Extra Pulmonary TB [42.9%]  
307 compared to cases [10.4%]. Individuals with a previous TB history were notably more common  
308 among cases [63.6%] than controls [10.4%], indicating it as a substantial risk factor [ $p < 0.001$ ;  
309 OR: 15.09; 95% CI: 6.34-35.91]. Similarly, cases were more likely to report close contact with  
310 TB patients [64.9%] compared to controls [32.5%], showing a significant association [ $p <$   
311  $0.001$ ; OR: 3.85; 95% CI: 1.97-7.51] likewise, cases were significantly associated with close  
312 contact with drug-resistant TB patients [ $p = 0.001$ ; OR: 78; 95% CI: 10.31-589.62] suggesting  
313 the exposure as a risk factor. Cases reported higher levels of perceived stigma, with concerns  
314 about losing friends and employment due to TB [ $p < 0.001$ ; OR: 7.12; 95% CI: 3.50-14.49]  
315 and feeling that people looked at them differently [ $p < 0.001$ ; OR: 6.17; 95% CI: 3.02-12.57],  
316 indicating poor psychosocial health. Additionally, cases exhibited a higher prevalence of  
317 nervousness [ $p < 0.001$ ; OR: 3.73; 95% CI: 1.86-7.45] and consistent sadness [ $p < 0.001$ ; OR:  
318 10.62; 95% CI: 4.63-24.36], signifying these as factors of concern. These findings highlight  
319 the importance of addressing these psychosocial risk factors alongside medical interventions

320 in TB management.

321 **Table 5: Association of MDR–TB with clinical characteristics of the respondents**

322

| Categories                                                | Case[n=77]  | Control [n=77] | P-value | OR    | 95% CI [Lower-Upper] |
|-----------------------------------------------------------|-------------|----------------|---------|-------|----------------------|
| <b>Tuberculosis Types</b>                                 |             |                |         |       |                      |
| Pulmonary TB                                              | 69 [89.6%]  | 44 [57.1%]     | <0.001  | 6.5   | 2.7-15.2             |
| Extra Pulmonary TB                                        | 08 [10.4%]  | 33 [42.9%]     |         |       |                      |
| <b>Previous history of TB</b>                             |             |                |         |       |                      |
| Yes                                                       | 49 [63.6%]  | 08 [10.4%]     | <0.001  | 15.09 | 6.34-35.91           |
| No                                                        | 28 [36.4%]  | 69 [89.6%]     |         |       |                      |
| <b>If yes, was there any interruption of TB treatment</b> |             |                |         |       |                      |
| Yes                                                       | 25 [51.0%]  | 01 [12.5%]     | 0.059   | 7.29  | 0.83-63.70           |
| No                                                        | 24 [49.0%]  | 07 [87.5%]     |         |       |                      |
| <b>Close contact with TB Patients</b>                     |             |                |         |       |                      |
| Yes                                                       | 50 [64.9%]  | 25 [32.5%]     | <0.001  | 3.85  | 1.97-7.51            |
| No                                                        | 27 [35.1%]  | 52 [67.5%]     |         |       |                      |
| <b>Close contact with Drug Resistant TB patients</b>      |             |                |         |       |                      |
| Yes                                                       | 39 [50.6%]  | 01 [1.3%]      | 0.001   | 78    | 10.31-589.62         |
| No                                                        | 38 [49.4%]  | 76 [98.7%]     |         |       |                      |
| <b>Response to TB treatment</b>                           |             |                |         |       |                      |
| Positive                                                  | 16 [20.8%]  | 26 [33.8%]     | 0.07    | 0.51  | 0.24 -1.06           |
| Negative                                                  | 61 [79.2%]  | 51 [66.2%]     |         |       |                      |
| <b>Experience of hospital stays</b>                       |             |                |         |       |                      |
| Yes                                                       | 69 [89.6%]  | 24 [31.2%]     | <0.001  | 19.04 | 7.92-45.76           |
| No                                                        | 08 [10.4%]  | 53 [68.8%]     |         |       |                      |
| <b>Attended any TB counselling sessions</b>               |             |                |         |       |                      |
| Yes                                                       | 42 [54.50%] | 66 [85.70%]    | <0.001  | 5     | 2.29-10.90           |
| No                                                        | 35 [45.50%] | 11 [14.30%]    |         |       |                      |
| <b>HIV status</b>                                         |             |                |         |       |                      |
| Positive                                                  | 5 [6.5%]    | 0 [0.0%]       | 0.02    | -     |                      |
| Negative                                                  | 72 [93.5%]  | 77 [100.0%]    |         |       |                      |
| <b>Presence of other disease</b>                          |             |                |         |       |                      |
| Yes                                                       | 24 [31.2%]  | 19 [24.7%]     | 0.36    | 1.38  | 0.68-2.80            |
| No                                                        | 53 [68.8%]  | 58 [75.3%]     |         |       |                      |
| <b>Alcohol Consumption</b>                                |             |                |         |       |                      |
| Yes                                                       | 59 [76.6%]  | 53 [68.8%]     | 0.278   | 1.48  | 0.72-3.03            |
| No                                                        | 18 [23.4%]  | 24 [31.2%]     |         |       |                      |
| <b>Smoking</b>                                            |             |                |         |       |                      |
| Yes                                                       | 40 [51.9%]  | 14 [18.2%]     | <0.001  | 4.86  | 2.34-10.11           |
| No                                                        | 37 [48.1%]  | 63 [81.8%]     |         |       |                      |
| <b>Illicit Drug</b>                                       |             |                |         |       |                      |
| Yes                                                       | 14 [18.2%]  | 2 [2.6%]       | 0.002   | 8.33  | 1.82-38.06           |
| No                                                        | 63 [81.8%]  | 75 [97.4%]     |         |       |                      |
| <b>Imprisonment</b>                                       |             |                |         |       |                      |
| Yes                                                       | 3 [3.90%]   | 2 [2.60%]      | 1.00    | 1.52  | 0.24-9.36            |
| No                                                        | 74 [96.10%] | 75 [97.40%]    |         |       |                      |



|                                                                         |             |             |        |       |            |
|-------------------------------------------------------------------------|-------------|-------------|--------|-------|------------|
| <b>Social Isolation</b>                                                 |             |             |        |       |            |
| Yes                                                                     | 41 [53.2%]  | 47 [61.0%]  | 0.329  | 0.72  | 0.38-1.37  |
| No                                                                      | 36 [46.8%]  | 30 [39.0%]  |        |       |            |
| <b>I feel that I will lose friends and employment because I have TB</b> |             |             |        |       |            |
| Yes                                                                     | 57 [74.0%]  | 22 [28.6%]  | <0.001 | 7.12  | 3.50-14.49 |
| No                                                                      | 20 [26.0%]  | 55 [71.4%]  |        |       |            |
| <b>People look at me differently because I have tuberculosis.</b>       |             |             |        |       |            |
| Yes                                                                     | 60 [77.9%]  | 28 [36.4%]  | <0.001 | 6.17  | 3.02-12.57 |
| No                                                                      | 17 [22.1%]  | 49 [63.6%]  |        |       |            |
| <b>I don't like other people to know that I have TB</b>                 |             |             |        |       |            |
| Yes                                                                     | 43 [55.8%]  | 53 [68.8%]  | <0.001 | 0.57  | 0.29-1.10  |
| No                                                                      | 34 [44.2%]  | 24 [31.2%]  |        |       |            |
| <b>I consider myself nervous.</b>                                       |             |             |        |       |            |
| Yes                                                                     | 59 [76.6%]  | 36 [46.8%]  | <0.001 | 3.73  | 1.86-7.45  |
| No                                                                      | 18 [23.4%]  | 41 [53.2%]  |        |       |            |
| <b>Sometimes, I feel so sad that nothing can cheer me up</b>            |             |             |        |       |            |
| Yes                                                                     | 45 [58.4%]  | 9 [11.7%]   | <0.001 | 10.62 | 4.63-24.36 |
| No                                                                      | 32 [41.6%]  | 68 [88.3%]  |        |       |            |
| <b>Did something trouble you during the past 12 months?</b>             |             |             |        |       |            |
| Yes                                                                     | 36 [46.8%]  | 11 [14.3%]  | <0.001 | 5.26  | 2.41-11.48 |
| No                                                                      | 41 [53.2%]  | 66 [85.7%]  |        |       |            |
| <b>Despite of disease, I think I am happy.</b>                          |             |             |        |       |            |
| Yes                                                                     | 61 [79.20%] | 68 [88.30%] | 0.126  | 1.98  | 0.81-4.81  |
| No                                                                      | 16 [20.80%] | 9 [11.70%]  |        |       |            |

323

324 After adjusting for the confounding factors, the final regression model [Table 6] showed that  
 325 subjects infected with pulmonary tuberculosis were 14 times more at risk for MDR-TB than  
 326 respondents with Extrapulmonary. Respondents who had previous TB treatment history were  
 327 found to have more than 5-fold risk for MDR TB than those who were not previously treated.  
 328 Similarly, respondents who were in close contact with DR-TB patients were found to be almost  
 329 22 times the risk for MDR-TB. In addition, MDR-TB patients were more [OR= 42.33, CI 1.36-  
 330 1315.4] likely to perceive subjective feeling of sadness.

331 Cases [Y] =  $\beta_0 + \beta_1$  [PTB]+  $\beta_2$  [PH]+  $\beta_3$  [DR-TB-C] +  $\beta_4$ [sad] Y= [- 5.342] + 2.6 + 1.622 +  
 332 3.099 + 3.746  
 333 Y= 5.725

334

335 This equation showed that one unit change in independent variables causes a 5.725 times  
 336 change in dependent variables.

337 **Table 6 Multivariate analysis of factors associated with MDR TB**

| Variables | Cat | $\beta$ | P value | Odds Ratio | 95% C.I. for OR |       |
|-----------|-----|---------|---------|------------|-----------------|-------|
|           |     |         |         |            | Lower           | Upper |

| <b>Tuberculosis Type</b>                                     | <b>EPTB**</b> | <b>Ref.</b> |       |       |       |        |
|--------------------------------------------------------------|---------------|-------------|-------|-------|-------|--------|
|                                                              | PTB           | 2.69        | 0.004 | 14.7  | 2.321 | 93.54  |
| <b>Previous TB treatment History</b>                         | No **         |             |       |       |       |        |
|                                                              | Yes           | 1.622       | 0.046 | 5.06  | 1.03  | 24.87  |
| <b>Close contact with DR TB patients</b>                     | No**          |             |       |       |       |        |
|                                                              | Yes           | 3.099       | 0.015 | 22.18 | 1.829 | 269.1  |
| <b>Sometimes, I feel so sad that nothing can cheer me up</b> | No**          |             |       |       |       |        |
|                                                              | Yes           | 3.746       | 0.033 | 42.35 | 1.364 | 1315.4 |
| <b>Constant</b>                                              |               | -5.342      | 0.013 | 0.005 |       |        |

338

339 \*\*: Reference, Cat: Categories, N= 154

340

## 341 Discussion

342

343 The study has provided relevant information about factors associated with MDR-TB, which  
 344 can support activities being implemented to decrease the burden of TB in Nepal for  
 345 policymakers. This study showed that Pulmonary Tuberculosis type, previous TB treatment  
 346 history, close contact with DR-TB patients and subjective feelings of sadness were the strong  
 347 predictors for MDR-TB.

348

349 Among sociodemographic factors, we identified that people residing in rural municipalities are  
 350 more likely to develop MDR-TB than those living in urban areas [p=0.02], as supported by  
 351 other studies(18,19). These data are alarming given the geographical features of our country  
 352 like Nepal. Whereas the study conducted in Ukraine showed that the prevalence of RR/MDR-  
 353 TB in the rural population was significantly lower than in the urban population at 20.9% and  
 354 29.0%, respectively [P = 0.000](20). This study also showed migration as one of the risk factors  
 355 of MDR-TB [P = 0.015, OR = 2.22, 95% CI 1.16-4.25]. The study conducted in China showed  
 356 that MDR is more prevalent among migrants [odds ratios [OR] 1.32, 95% confidence interval  
 357 [CI] 1.02–1.72](21); migration is considered an important contributor to missing cases and may  
 358 lead to poor outcomes(22). To mitigate the number of migrants, it's essential to ensure uniform  
 359 standards of care accessible nationwide, facilitated by robust communication channels such as  
 360 telemedicine and referral systems. Additionally, implementing a unique identifier system  
 361 would enable seamless patient connectivity across provinces and the entire nation.

362

363 This study showed that inadequate ventilation at home was a risk factor for MDR-TB [ $p =$   
364 0.01]. Poor ventilation and overcrowding have been documented as a risk factor for MDR-TB  
365 in several other studies in a variety of settings as well(23,24). Likewise, those subjects who  
366 lived in a house with no window or one window were almost two times more likely to develop  
367 airborne infection compared to people whose house has multiple windows [AOR = 1.81; 95%  
368 CI:1.06, 3.07](25), which may be due to the availability of favourable environment for MDR-  
369 TB transmission. Therefore, advocating for adequate ventilation is crucial to disrupt the  
370 transmission chain of MDR-TB.

371 Our study showed clinical features such as types of TB, previous TB treatment history, close  
372 contact with TB and DR-TB patients, and experience of hospital stays as the risk factors of  
373 MDR-TB with  $p = 0.001$  for each factor. The majority of cases [89.6%]and controls [57.1%]  
374 had Pulmonary Tuberculosis, which is similar to the study conducted in Ethiopia, with the  
375 majority of participants having pulmonary TB in cases 141 [92.2%] and controls 137 [89.5%]  
376 (26). We found that patients having Pulmonary Tuberculosis were more likely to develop  
377 MDR-TB than those of Extra pulmonary TB patients, which is statistically significant in the  
378 final binary logistic regression model with OR = 14.735, 95% CI [2.321-93.54], as confirmed  
379 by the different studies in different countries; Germany(27), India(28) and Thailand(29).

380

381

382 This study showed previous TB treatment history was strongly associated with MDR-TB in  
383 final regression model, with OR= 5.601 [95% CI, 1.03-24.876]. The increased proportion of  
384 MDR-TB among previously treated cases has been indicated in various studies of various  
385 settings(28–33); The rise in MDR-TB cases among previously treated individuals underscores  
386 the urgency for higher quality treatment to prevent the development of drug resistance. Our  
387 study showed that, 51.0% of MDR cases had interruption of TB treatment, which is similar to  
388 the study conducted by Sanju B et al in 2017(34). We found patients with Interruption in TB  
389 treatment were more likely to develop MDR-TB than those without TB-Treatment interruption  
390 [ $p= 0.059$ , OR= 7.292, 95%CI 0.83-63.79], and another study also confirmed interruption of  
391 treatment as a risk factors of MDR-TB [28,35–38]. Interruption of TB treatment promotes the  
392 risk of bacterial mutations that eventually culminate in relapses and MDR- TB.

393 Our study showed that 64.9% of cases had history of contact with TB patient. Those who had  
394 history of close contact with TB patients were more likely to develop MDR-TB than those  
395 without close contact [ $p<0.001$ , OR=3.85, CI 1.974-71.5]. Several study conducted in different  
396 settings also confirmed that close contact with TB patients is a risk factors of MDR-

397 TB[31,34,39], which is contrast to the study conducted in Ethiopia(40).  
398 Similarly, Close contact with DR-TB patients was found to be a risk factor of MDR-TB. Final  
399 regression model indicated that close contact with DR-TB patients increase the risk of MDR-  
400 TB by 22.183 times [OR= 22.183,95% CI,1.829-268.12]. several studies documented close  
401 contact with DR-TB as the major risk factors of MDR-TB(37,41,42), which is contrast to the  
402 study conducted in Serbia (43).Our study showed that experience of hospital stays as a risk  
403 factor of MDR-TB [p = 0.001] ie, patient who had hospitalization history were more likely to  
404 develop MDR-TB than those who do not have previous history of hospital stay [p < 0.001,  
405 OR= 19.047, 95% CI , 7.92-45.76], which is also documented in other studies(25,44). The  
406 study conducted by v. Crudu et al documented that ,in 75% of cases, the MDR-TB strain was  
407 genetically distinct from the non-MDR-TB strain at baseline, suggesting a high rate of  
408 nosocomial transmission of MDR-TB(40). Proper infection control measures in health facilities  
409 are crucial to protect other patients and healthcare workers, whereas preventive measures to  
410 reduce transmission within community is required.

411  
412 This study showed that not attending TB counselling sessions [p < 0.001, OR = 5, 95%CI 2.92-  
413 10.90] is the risk factor for MDR-TB. One of the studies concluded that the Provision of  
414 counselling and financial support may not only reduce their vulnerability but also increase cure  
415 rates of MDR-TB(45). This study showed that smokers were more likely to develop MDR-TB  
416 than non-smokers [p<0.001, OR=4.8, 95%CI 2.34-10.11], as confirmed by other studies  
417 conducted in a different setting, china (46,47), Ethiopia(48), Lima Peru(49), Sudan(50), which  
418 is a contrast to the study conducted in Addis Ababa (36), Nepal(51). Smoking had also affected  
419 the global TB treatment success rate as shown in the study[65]. This study showed illicit drug  
420 use as the risk factor of MDR- TB [ P = 0.002, OR = 8.33, 95%CI 1.82-38.06], which is in  
421 contrast to the study conducted in Canada(52) and Ethiopia(40). Engaging in illicit drug use  
422 and smoking can disrupt the balance of the immune system, potentially heightening  
423 susceptibility to infection.

424 This study showed that, stigma associated with TB as a risk factors of MDR-TB [p <0.001,  
425 OR=0.72, 95%CI 0.38-1.37], which is similar to the study conducted in Serbia(43), china(47),  
426 Nepal(45). It's imperative to safeguard and defend the rights of all individuals with  
427 tuberculosis, as well as those most vulnerable to contracting the disease, Implementing policies  
428 and practices aimed at shielding them from stigmatization and discrimination is essential(4).  
429 There was significant difference in mental health of the respondents, this study showed  
430 Significant difference between the both groups in persistence of subjective feeling of

431 nervousness [  $P < 0.001$ ,  $OR=3.77$ ,  $95\%CI 1.86-7.45$ ], persistence of subjective feeling of  
432 sadness [ $p < 0.001$ ,  $OR= 42.33$ ,  $CI 1.36- 1315.4$ ] and experience of difficult situations in last  
433 12 months [ $p < 0.001$ ,  $OR=5.26$  [2.416-11.488], which is similar to the study conducted in  
434 Serbia (43). The study conducted in china also showed experience more life pressure/stress  
435 [AOR, 10.8; 95% CI, 2.8–41.5] as the risk factors of MDR-TB(23)A life rejuvenation program  
436 tailored for tuberculosis patients in high-risk areas is imperative. As the study covers a large  
437 number of DR-TB cases in Nepal during the study period, the findings can be generalized.

438

### 439 **Strengths and Limitation**

440

441 Strengths of the study include collecting information on recent episodes of previous TB  
442 treatment aimed at minimising recall bias. However, a notable limitation is the absence of data  
443 on additional treatment episodes, particularly concerning patients with multidrug-resistant  
444 tuberculosis [MDR-TB] who often undergo multiple treatments. Additionally, while the study  
445 successfully achieved its objectives, it did not employ multiple data-gathering methods to  
446 explore sensitive topics such as stigma and mental health issues. Notably, this study represents  
447 the first attempt to investigate the risk factors of multidrug-resistant tuberculosis in three  
448 districts of province number 3, which harbours the highest burden of DR-TB cases in Nepal,  
449 favouring generalisation of findings.

450

### 451 **CONCLUSION**

452

453 This case-control study delved into factors associated with MDR-TB occurrence, identifying  
454 Pulmonary Tuberculosis, prior TB treatment history, close contact with DR-TB patients, and  
455 persistent subjective feelings of sadness as strong risk factors. The findings underscore the  
456 necessity for quality treatment coupled with attentive monitoring to curb drug resistance  
457 evolution among previously treated patients. Preventive measures should emphasize breaking  
458 transmission chains within communities, bolstered by robust infection control measures in  
459 healthcare facilities to minimize acquired MDR-TB cases among visitors, patients, and health  
460 workers. Additionally, the study underscores the pressing need for life rejuvenation programs  
461 targeting tuberculosis patients to safeguard their mental well-being.

462

### 463 **List of abbreviations**

464 AMR : Anti-Microbial Resistance, AOR : Adjusted Odds Ratio, BPKIHS : B.P. Koirala

465 Institute of Health Sciences, CAT-I : Category I, CI : Confidence Interval, COPD :  
466 Chronic Obstructive Pulmonary Diseases, DOTS : Directly Observed Treatment Short  
467 Course, DR-TB : Drug-Resistant Tuberculosis, DST : Drug Susceptibility Test, DS-TB :  
468 Drug-Susceptible Tuberculosis, EPTB : Extra Pulmonary Tuberculosis, HF : Health  
469 Facility, HIV/AIDS : Human Immunodeficiency Virus/Acquired Immunodeficiency  
470 Syndrome, HR : Isoniazid, Rifampicin, HRZE : Isoniazid, Rifampicin, Pyrazinamide,  
471 Ethambutol, HRZELfx : Isoniazid, Rifampicin, Pyrazinamide, Ethambutol, Levofloxacin,  
472 JANTRA : Japan Nepal Health and Tuberculosis Research Association, LPA : Line Probe  
473 Assay, LR-1 : Longer Regiment I, LR-2 : Longer Regiment II, LR-3 : Longer Regiment  
474 III, LTBI : Latent Tuberculosis Infection, M. Tuberculosis : Mycobacterium Tuberculosis,  
475 MDR-TB : Multi-Drug-Resistant Tuberculosis, MDR/RR-TB : Multi-Drug-Resistant  
476 Rifampicin-Resistant Tuberculosis, NATA : Nepal Anti Tuberculosis Association, NTC :  
477 National Tuberculosis Center, OR : Odds Ratio, PLS-PM : Partial Least Square Path  
478 Modelling, PTB : Pulmonary Tuberculosis, RR/MDR : Rifampicin-Resistant/Multi-Drug-  
479 Resistant, SDG : Sustainable Development Goals, SEAR : South East Asia Region, SPSS  
480 : Statistical Package for the Social Sciences, SSTR : Shorter Standardized Treatment  
481 Regimen, TB : Tuberculosis, TPT : Tuberculosis Preventive Therapy, TSR : Treatment  
482 Success Rate, WHO : World Health Organization, XDRTB : Extremely Drug-Resistant  
483 Tuberculosis

484

#### 485 **Acknowledgements**

486 The authors would like to acknowledge Dr Suvesh Kumar Shrestha for his valuable insights  
487 and sincerely thank all the participants.

488

#### 489 **Author's contribution**

490 **Conceptualisation:** Puspa Acharya, Niraj Bhattarai, Vijay Kumar Khanal

491 **Data curation:** Puspa Acharya, Niraj Bhattarai , Dr Bhuban Raj Kunwar ,Birendra Kuma  
492 Yadav,

493 **Formal analysis:** Puspa Acharya, Niraj Bhattarai , Khem Raj Sharma

494 **Methodology:** Puspa Acharya, Niraj Bhattarai, Dr Bhuban Raj Kunwar

495 **Supervision:** Vijay Kumar Khanal, Birendra Kuma Yadav, Khem Raj Sharma , Dr Bhuban  
496 Raj Kunwar

497 **Validation:** Vijay Kumar Khanal, Birendra Kuma Yadav, Khem Raj Sharma , Dr Bhuban Raj



498 Kunwar

499 **Writing original draft:** Puspa Acharya, Niraj Bhattarai

500 **Writing-review and editing:** Puspa Acharya, Niraj Bhattarai, Dr Bhuban Raj Kunwar

501 **Conflicts of interest**

502 Authors declare no conflicts of interest.

503 **Funding**

504 Authors receive no funding for this study.

505 **Ethics**

506 The study was conducted from March 2021 to August 2021. Ethical approval was obtained  
507 from the Institutional Review Committee [IRC] of BP Koirala Institute of Health Sciences  
508 [BPKIHS], Dharan, dated 18 Feb 2021, with IRC No. Acd/597. An original copy of the ethical  
509 approval is submitted as supplementary files. Verbal consent was obtained from the  
510 participants, and the study maintained their anonymity.

511

512 **Supporting Information**

513 S 1: Original copy of ethical approval from the Institutional Review Committee.

514

515 **References**

516

517

518 1. WHO. Global tuberculosis report 2019. Geneva: World Health Organization; 2019.

519 Licence: CC BY-NC-SA 3.0 IGO. 2019.

520 2. Rock D. Tuberculosis: a global emergency. *Work* [Internet]. 1997;8(1):93–105.

521 Available from:

522 [https://www.medra.org/servlet/aliasResolver?alias=iospress&doi=10.3233/WOR-](https://www.medra.org/servlet/aliasResolver?alias=iospress&doi=10.3233/WOR-1997-8111)  
523 [1997-8111](https://www.medra.org/servlet/aliasResolver?alias=iospress&doi=10.3233/WOR-1997-8111)

524 3. World Health Organization. What is DOTS ? A Guide to Understanding the WHO-  
525 recommended TB Control Strategy Known as DOTS. *Prev Control* [Internet]. 1999;1–  
526 39. Available from: <https://apps.who.int/iris/handle/10665/65979>

527 4. Reid MJA, Arinaminpathy N, Bloom A, Bloom BR, Boehme C, Chaisson R, et al.  
528 Building a tuberculosis-free world: The Lancet Commission on tuberculosis. *Lancet*  
529 [Internet]. 2019 Mar;393(10178):1331–84. Available from:

530 <https://linkinghub.elsevier.com/retrieve/pii/S0140673619300248>

531 5. WHO. Follow-up to the high-level meetings of the UN General Assembly on health-



- 532 related issues AMR Report by the Director-General. Seventy-second World Heal  
533 Assem [Internet]. 2019;(April):1–11. Available from: <https://amrcountryprogress.org>.
- 534 6. Tb D. Focus on Drug-resistant Tuberculosis. Glob Fund 2019 [Internet]. 2019;  
535 Available from: [https://www.theglobalfund.org/media/6651/publication\\_drug-  
536 resistanttuberculosis\\_focuson\\_en.pdf?u=63645035838000000](https://www.theglobalfund.org/media/6651/publication_drug-resistanttuberculosis_focuson_en.pdf?u=63645035838000000)
- 537 7. Law S, Piatek AS, Vincent C, Oxlade O, Menzies D. Emergence of drug resistance in  
538 patients with tuberculosis cared for by the Indian health-care system: a dynamic  
539 modelling study. *Lancet Public Heal* [Internet]. 2017;2(1):e47–55. Available from:  
540 [http://dx.doi.org/10.1016/S2468-2667\(16\)30035-4](http://dx.doi.org/10.1016/S2468-2667(16)30035-4)
- 541 8. GON, MOHP, DOHS, NTCC. National Tuberculosis Program Nepal. NTCC, editor.  
542 Vol. 75, Annual Report. Bhaktapur: NTC; 2018. 1–30 p.
- 543 9. World Health Organization. Consolidated Guidelines on Tuberculosis Treatment.  
544 Who. 2019.
- 545 10. Ending TB: Invest Now or Pay Later. New Delhi: World Health Organization,  
546 Regional Office for South-East Asia; 2018. Licence: CC BY-NC- SA 3.0 IGO. 2018;
- 547 11. Hwang SS, Kang S, Lee JY, Lee JS, Kim HJ, Han SK, et al. Impact of outdoor air  
548 pollution on the incidence of tuberculosis in the Seoul metropolitan area, South Korea.  
549 *Korean J Intern Med*. 2014;29(2):183–90.
- 550 12. WHO. ENDING TB IN SEAR, Regional strategic plan 2016-2020. Vol. 53, Journal of  
551 Chemical Information and Modeling. 2013. 1689–1699 p.
- 552 13. Institute of Health Metrix and Evaluations [IHME]. Findings from the Global Burden  
553 of Disease Study 2017. Seattle, WA: IHME, 2018. *Lancet*. 2017;
- 554 14. The Economist Intelligence Unit. It ’s Time to End Drug-Resistant Tuberculosis. The  
555 case for action. 2019;1–39. Available from:  
556 [http://www.eiu.com/graphics/marketing/pdf/its-time-to-end-drug-resistant-  
557 tuberculosis-full-report.pdf](http://www.eiu.com/graphics/marketing/pdf/its-time-to-end-drug-resistant-tuberculosis-full-report.pdf)
- 558 15. Bhatia V, Srivastava R, Reddy KS, Sharma M, Mandal PP, Chhabra N, et al. Ending  
559 TB in Southeast Asia: Current resources are not enough. *BMJ Glob Heal*. 2020;5(3):1–  
560 11.
- 561 16. Shrestha SK, Shah NP, Jha KK, Pant RP, Joshi LR, Bichha RP, et al. Challenges in the  
562 diagnosis of drug-resistant tuberculosis by GeneXpert MTB/Rif in Nepal. *SAARC J  
563 Tuberc Lung Dis HIV/AIDS*. 2018;16(2):8–15.
- 564 17. Comolet T. La tuberculose à bacilles multi-résistants : défis d’une émergence globale.  
565 *Bull la Soc Pathol Exot*. 2015;108(4):290–8.

- 566 18. Abdella K, Abdissa K, Kebede W, Abebe G. Drug resistance patterns of  
567 Mycobacterium tuberculosis complex and associated factors among retreatment cases  
568 around Jimma, Southwest Ethiopia. *BMC Public Health* [Internet]. 2015 Jul 2 [cited  
569 2021 Mar 9];15(1):599. Available from:  
570 <http://bmcpublichealth.biomedcentral.com/articles/10.1186/s12889-015-1955-3>
- 571 19. Ali MH, Alrasheedy AA, Hassali MA, Kibuule D, Godman B. Predictors of multidrug-  
572 resistant tuberculosis (MDR-TB) in Sudan. *Antibiotics*. 2019 Sep 1;8(3).
- 573 20. Korotych O, Hovhannisyann A, Zaitseva O, Denisuk O, Dadu A, Dara M. Risk factors  
574 associated with RR/MDR-TB among new pulmonary tuberculosis patients in urban  
575 and rural areas of Ukraine in 2017: retrospective analysis of routine surveillance data.  
576 *Public Heal Panor*. 2019;5(4):536–47.
- 577 21. Liu L, Zhang X, Zhao L, Li N. Empirical analysis of the status and influencing factors  
578 of catastrophic health expenditure of migrant workers in Western China. *Int J Environ*  
579 *Res Public Health*. 2019;16(5):1–10.
- 580 22. Ismail N, Ismail F, Omar S V., Blows L, Gardee Y, Koornhof H, et al. Drug resistant  
581 tuberculosis in Africa: Current status, gaps and opportunities. *Afr J Lab Med*.  
582 2018;7(2):1–11.
- 583 23. Li W Bin, Zhang YQ, Xing J, Ma ZY, Qu YH, Li XX. Factors associated with primary  
584 transmission of multidrug-resistant tuberculosis compared with healthy controls in  
585 Henan Province, China. *Infect Dis Poverty* [Internet]. 2015 Mar 24 [cited 2021 Mar  
586 8];4(1):14. Available from:  
587 <https://idpjournal.biomedcentral.com/articles/10.1186/s40249-015-0045-1>
- 588 24. Escombe AR, Oeser CC, Gilman RH, Navincopa M, Ticona E, Pan W, et al. Natural  
589 Ventilation for the Prevention of Airborne Contagion. *PLOS Med* [Internet]. 2007  
590 [cited 2021 Mar 9];4(2):e68. Available from:  
591 <https://journals.plos.org/plosmedicine/article?id=10.1371/journal.pmed.0040068>
- 592 25. Shimeles E, Enquesselassie F, Aseffa A, Tilahun M, Mekonen A, Wondimagegn G, et al.  
593 Risk factors for tuberculosis: A case–control study in Addis Ababa, Ethiopia. *PLoS*  
594 *One*. 2019;14(4):1–18.
- 595 26. Mulu W, Mekonnen D, Yimer M, Admassu A, Abera B. Risk factors for multidrug  
596 resistant tuberculosis patients in amhara national regional state. *Afr Health Sci*.  
597 2015;15(2):368–77.
- 598 27. Glasauer S, Altmann D, Hauer B, Brodhun B, Haas W, Perumal N. First-line  
599 tuberculosis drug resistance patterns and associated risk factors in Germany, 2008-

- 600 2017. *PLoS One*. 2019;14(6):2008–17.
- 601 28. Gaude G, Hattiholli J, Kumar P. Risk factors and drug-resistance patterns among  
602 pulmonary tuberculosis patients in northern Karnataka region, India. *Niger Med J*  
603 [Internet]. 2014 [cited 2021 Mar 9];55(4):327. Available from:  
604 <http://www.nigeriamedj.com/text.asp?2014/55/4/327/137194>
- 605 29. Chuchottaworn C, Thanachartwet V, Sangsayunh P, Than TZM, Sahassananda D,  
606 Surabotsophon M, et al. Risk Factors for Multidrug-Resistant Tuberculosis among  
607 Patients with Pulmonary Tuberculosis at the Central Chest Institute of Thailand.  
608 Munderloh UG, editor. *PLoS One* [Internet]. 2015 Oct 7 [cited 2021 Mar  
609 9];10(10):e0139986. Available from:  
610 <https://dx.plos.org/10.1371/journal.pone.0139986>
- 611 30. Isaakidis P, Das M, Kumar AMV, Peskett C, Khetarpal M, Bamne A, et al. Alarming  
612 levels of drug-resistant tuberculosis in HIV-infected patients in metropolitan Mumbai,  
613 India. *PLoS One*. 2014 Oct 21;9(10):e110461.
- 614 31. Baya B, Achenbach CJ, Kone B, Toloba Y, Dabita DK, Diarra B, et al. Clinical risk  
615 factors associated with multidrug-resistant tuberculosis (MDR-TB) in Mali. *Int J Infect*  
616 *Dis* [Internet]. 2019 Apr 1 [cited 2021 Mar 9];81:149–55. Available from:  
617 <https://doi.org/10.1016/j.ijid.2019.02.004>
- 618 32. Eshetie S, Gizachew M, Dagne M, Kumera G, Woldie H, Ambaw F, et al. Multidrug  
619 resistant tuberculosis in Ethiopian settings and its association with previous history of  
620 anti-tuberculosis treatment: A systematic review and meta-analysis. *BMC Infect Dis*.  
621 2017 Mar 20;17(1).
- 622 33. Su WJ, Feng JY, Huang CC, Perng RP. Increasing drug resistance of *Mycobacterium*  
623 tuberculosis isolates in a medical center in northern Taiwan. *J Formos Med Assoc*.  
624 2008 Mar 1;107(3):259–64.
- 625 34. B S, A S. Contributing Factors Associated with Multi-Drugs Resistance Tuberculosis  
626 among MDR-TB Clients of Kathmandu, Nepal. *Int J Heal Sci Res*. 2017;7(july):164–  
627 70.
- 628 35. Khan MS, Hutchison C, Coker RJ, Yoong J, Hane KM, Innes AL, et al. Preventing  
629 emergence of drug resistant tuberculosis in Myanmar’s transitioning health system.  
630 *Health Policy Plan*. 2017;32:ii43–50.
- 631 36. Hirpa S, Medhin G, Girma B, Melese M, Mekonen A, Suarez P, et al. Determinants of  
632 multidrug-resistant tuberculosis in patients who underwent first-line treatment in Addis  
633 Ababa: A case control study. *BMC Public Health*. 2013;13(1):1–9.

- 634 37. Gobena D, Ameya G, Haile K, Abreha G, Worku Y, Debela T. Predictor of multidrug  
635 resistant tuberculosis in southwestern part of Ethiopia: A case control study. *Ann Clin*  
636 *Microbiol Antimicrob*. 2018 Jul 3;17(1).
- 637 38. Moyo S, Cox HS, Hughes J, Daniels J, Synman L, De Azevedo V, et al. Loss from  
638 treatment for drug resistant tuberculosis: Risk factors and patient outcomes in a  
639 community-based program in khayelitsha, South Africa. *PLoS One*. 2015;10(3):1–13.
- 640 39. Demile B, Zenebu A, Shewaye H, Xia S, Guadie A. Risk factors associated with  
641 multidrug-resistant tuberculosis (MDR-TB) in a tertiary armed force referral and  
642 teaching hospital, Ethiopia. *BMC Infect Dis*. 2018 May 31;18(1).
- 643 40. Workicho A, Kassahun W, Alemseged F. Risk factors for multidrug-resistant  
644 tuberculosis among tuberculosis patients: A case-control study. *Infect Drug Resist*.  
645 2017 Mar 13;10:91–6.
- 646 41. Mulu W, Mekonnen D, Yimer M, Admassu A, Abera B. Risk factors for multidrug  
647 resistant tuberculosis patients in amhara national regional state. *Afr Health Sci*  
648 [Internet]. 2015 [cited 2021 Mar 9];15(2):368–77. Available from:  
649 [/pmc/articles/PMC4480497/](https://pubmed.ncbi.nlm.nih.gov/274480497/)
- 650 42. Guenaoui K, Harir N, Ouardi A, Zeggai S, Sellam F, Bekri F, et al. Use of GeneXpert  
651 *Mycobacterium tuberculosis*/rifampicin for rapid detection of rifampicin resistant  
652 *Mycobacterium tuberculosis* strains of clinically suspected multi-drug resistance  
653 tuberculosis cases. *Ann Transl Med*. 2016 May 1;4(9):168.
- 654 43. Stosic M, Vukovic D, Babic D, Antonijevic G, Foley KL, Vujcic I, et al. Risk factors  
655 for multidrug-resistant tuberculosis among tuberculosis patients in Serbia: A case-  
656 control study. *BMC Public Health* [Internet]. 2018 Sep 12 [cited 2021 Mar  
657 9];18(1):1114. Available from:  
658 <https://bmcpublichealth.biomedcentral.com/articles/10.1186/s12889-018-6021-5>
- 659 44. Mesfin EA, Beyene D, Tesfaye A, Admasu A, Addise D, Amare M, et al. Drug-  
660 resistance patterns of mycobacterium tuberculosis strains and associated risk factors  
661 among multi drug-resistant tuberculosis suspected patients from Ethiopia. *PLoS One*.  
662 2018;13(6):1–16.
- 663 45. Baral SC, Aryal Y, Bhattra R, King R, Newell JN. The importance of providing  
664 counselling and financial support to patients receiving treatment for multi-drug  
665 resistant TB: Mixed method qualitative and pilot intervention studies. *BMC Public*  
666 *Health* [Internet]. 2014 Jan 17 [cited 2021 Mar 15];14(1):46. Available from:  
667 [http://bmcpublichealth.biomedcentral.com/articles/10.1186/1471-2458-14-46](https://bmcpublichealth.biomedcentral.com/articles/10.1186/1471-2458-14-46)

- 668 46. Tang S, Tan S, Yao L, Li F, Li L, Guo X, et al. Risk factors for poor treatment  
669 outcomes in patients with MDR-TB and XDR-TB in China: Retrospective multi-center  
670 investigation. *PLoS One*. 2013;8(12):1–8.
- 671 47. Zhang C, Wang Y, Shi G, Han W, Zhao H, Zhang H, et al. Determinants of multidrug-  
672 resistant tuberculosis in Henan province in China: a case control study. *BMC Public*  
673 *Health*. 2016 Jan 16;16(1):42.
- 674 48. Welekidan LN, Skjerve E, Dejene TA, Gebremichael MW, Brynildsrud O, Agdestein  
675 A, et al. Characteristics of pulmonary multidrug-resistant tuberculosis patients in  
676 Tigray Region, Ethiopia: A cross-sectional study. Quinn F, editor. *PLoS One*  
677 [Internet]. 2020 Aug 14 [cited 2021 Mar 9];15(8):e0236362. Available from:  
678 <https://dx.plos.org/10.1371/journal.pone.0236362>
- 679 49. Chung-Delgado K, Revilla-Montag A, Guillen-Bravo S, Velez-Segovia E, Soria-  
680 Montoya A, Nuñez-Garbin A, et al. Factors associated with anti-tuberculosis  
681 medication adverse effects: A case-control study in Lima, Peru. *PLoS One*.  
682 2011;6(11):1–5.
- 683 50. Elduma AH, Mansournia MA, Foroushani AR, Ali HMH, Elegail AMA, Elsony A, et  
684 al. Assessment of the risk factors associated with multidrug-resistant tuberculosis in  
685 Sudan: a case-control study. *Epidemiol Health*. 2019;41:e2019014.
- 686 51. Bichha RP, Jha KK, Salhotra VS, Weerakoon AP, Karki KB, Bichha N. An  
687 Epidemiological Study to Find out Risk Factors of Multi Drugs Resistance  
688 Tuberculosis in Nepal. *SAARC J Tuberc Lung Dis HIV/AIDS*. 2018;14(2):31–8.
- 689 52. Hiramata T, Sabur N, Derkach P, McNamee J, Song H, Marras T, et al. Risk factors for  
690 drug-resistant tuberculosis at a referral centre in Toronto, Ontario, Canada: 2010–  
691 2016. *Canada Commun Dis Rep*. 2020 Apr 2;46(04):84–92.
- 692  
693  
694
